# Supplementary material
Source: PubMed Central journal article supplement (PMC8288673)
Supplement: advancesADV2021004288-suppl1.pdf [file advancesADV2021004288-suppl1.pdf]

# Secure COVID-19 SCD

## Reporting of COVID-19 cases in SCD globally

This form is to be completed by a health care professional caring for a patient with sickle cell disease and documented coronavirus (COVID 19).

Please report only confirmed COVID-19 cases, and report after sufficient time has passed to observe the disease course through resolution of acute illness and/or death.

Fields marked with a red asterisk (\*) are required.

If you have any questions, please contact us at: covid.sicklecell@mcw.edu.

## Reporter Information

Name of reporter \*

---

Email address of reporter \*

---

Name of physician providing care for Sickle Cell disease \*

---

Name of center/practice providing care for Sickle Cell disease \*

---

## Patient Information

Age, in years \*

---

---

Country of residence

- Not in this country list ---
- Åland Islands
- Afghanistan
- Albania
- Algeria
- Andorra
- Angola
- Anguilla
- Antarctica
- Antigua and Barbuda
- Argentina
- Armenia
- Aruba
- Australia
- Austria
- Azerbaijan
- Bahamas
- Bahrain
- Bangladesh
- Barbados
- Belarus
- Belgium
- Belize
- Benin
- Bermuda
- Bhutan
- Bolivia, Plurinational State of
- Bosnia and Herzegovina
- Botswana
- Bouvet Island
- Brazil
- British Indian Ocean Territory
- Brunei Darussalam
- Bulgaria
- Burkina Faso
- Burundi
- Côte d'Ivoire
- Cambodia
- Cameroon
- Canada
- Cape Verde
- Cayman Islands
- Central African Republic
- Chad
- Chile
- China
- Christmas Island
- Cocos (Keeling) Islands
- Colombia
- Comoros
- Congo
- Congo, the Democratic Republic of the
- Cook Islands
- Costa Rica
- Croatia
- Cuba
- Cyprus
- Czech Republic
- Denmark
- Djibouti
- Dominica
- Dominican Republic
- Ecuador
- Egypt
- El Salvador
- Equatorial Guinea
- Eritrea
- Estonia
- Ethiopia

- Falkland Islands (Malvinas)
- Faroe Islands
- Fiji
- Finland
- France
- French Guiana
- French Polynesia
- French Southern Territories
- Gabon
- Gambia
- Georgia
- Germany
- Ghana
- Gibraltar
- Greece
- Greenland
- Grenada
- Guadeloupe
- Guatemala
- Guernsey
- Guinea
- Guinea-Bissau
- Guyana
- Haiti
- Heard Island and McDonald Islands
- Holy See (Vatican City State)
- Honduras
- Hong Kong
- Hungary
- Iceland
- India
- Indonesia
- Iran, Islamic Republic of
- Iraq
- Ireland
- Isle of Man
- Israel
- Italy
- Jamaica
- Japan
- Jersey
- Jordan
- Kazakhstan
- Kenya
- Kiribati
- Korea, Democratic Peoples Republic of
- Korea, Republic of
- Kuwait
- Kyrgyzstan
- Lao Peoples Democratic Republic
- Latvia
- Lebanon
- Lesotho
- Liberia
- Libyan Arab Jamahiriya
- Liechtenstein
- Lithuania
- Luxembourg
- Macao
- Macedonia, the former Yugoslav Republic of
- Madagascar
- Malawi
- Malaysia
- Maldives
- Mali
- Malta
- Marshall Islands
- Martinique
- Mauritania
- Mauritius
- Mayotte

- Mexico
- Micronesia, Federated States of
- Moldova, Republic of
- Monaco
- Mongolia
- Montenegro
- Montserrat
- Morocco
- Mozambique
- Myanmar
- Namibia
- Nauru
- Nepal
- Netherlands
- Netherlands Antilles
- New Caledonia
- New Zealand
- Nicaragua
- Niger
- Nigeria
- Niue
- Norfolk Island
- Northern Mariana Islands
- Norway
- Oman
- Pakistan
- Palau
- Palestinian Territory, Occupied
- Panama
- Papua New Guinea
- Paraguay
- Peru
- Philippines
- Pitcairn
- Poland
- Portugal
- Qatar
- Ré union
- Romania
- Russian Federation
- Rwanda
- Saint Barthélemy
- Saint Helena, Ascension and Tristan da Cunha
- Saint Kitts and Nevis
- Saint Lucia
- Saint Martin (French part)
- Saint Pierre and Miquelon
- Saint Vincent and the Grenadines
- Samoa
- San Marino
- Sao Tome and Principe
- Saudi Arabia
- Senegal
- Serbia
- Seychelles
- Sierra Leone
- Singapore
- Slovakia
- Slovenia
- Solomon Islands
- Somalia
- South Africa
- South Georgia and the South Sandwich Islands
- Spain
- Sri Lanka
- Sudan
- Suriname
- Svalbard and Jan Mayen
- Swaziland
- Sweden
- Switzerland

- Syrian Arab Republic
- Taiwan, Province of China
- Tajikistan
- Tanzania, United Republic of
- Thailand
- Timor-Leste
- Togo
- Tokelau
- Tonga
- Trinidad and Tobago
- Tunisia
- Turkey
- Turkmenistan
- Turks and Caicos Islands
- Tuvalu
- Uganda
- Ukraine
- United Arab Emirates
- United Kingdom
- United States
- Uruguay
- Uzbekistan
- Vanuatu
- Venezuela, Bolivarian Republic of
- Vietnam
- Virgin Islands, British
- Wallis and Futuna
- Western Sahara
- Yemen
- Zambia
- Zimbabwe

---

State of residence (if applicable)

- ALABAMA    ALASKA  
 AMERICAN SAMOA    ARIZONA  
 ARKANSAS    CALIFORNIA  
 COLORADO    CONNECTICUT  
 DELAWARE    DISTRICT OF COLUMBIA  
 FLORIDA    GEORGIA  
 GUAM    HAWAII    IDAHO  
 ILLINOIS    INDIANA  
 IOWA    KANSAS    KENTUCKY  
 LOUISIANA    MAINE  
 MARYLAND    MASSACHUSETTS  
 MICHIGAN    MINNESOTA  
 MISSISSIPPI    MISSOURI  
 MONTANA    NEBRASKA  
 NEVADA    NEW HAMPSHIRE  
 NEW JERSEY    NEW MEXICO  
 NEW YORK    NORTH CAROLINA  
 NORTH DAKOTA    OHIO  
 OKLAHOMA    OREGON  
 PENNSYLVANIA    PUERTO RICO  
 RHODE ISLAND    SOUTH CAROLINA  
 SOUTH DAKOTA    TENNESSEE  
 TEXAS    UTAH    VERMONT  
 VIRGIN ISLANDS    VIRGINIA  
 WASHINGTON    WEST VIRGINIA  
 WISCONSIN    WYOMING

---

Gender

- Female  
 Male  
 Other

---

Race (may check more than one)

- White  
 Black or African American  
 American Indian / Native Alaskan  
 Asian  
 Native Hawaiian / Pacific Islander  
 Other

---

Please specify other race

\_\_\_\_\_

---

Ethnicity

- Hispanic/Latino  
 Not Hispanic/Latino  
 Unknown / Chose not to answer

---

Disease factors Sickle Cell genotype:

- Hemoglobin SS disease  
 Hemoglobin S beta zero thalassemia  
 Hemoglobin SC disease  
 Hemoglobin S beta + thalassemia  
 Other

---

Please specify genotype

\_\_\_\_\_

---

Patient weight (kg)

\_\_\_\_\_

**Home SCD Medications**

Home SCD medications at time of COVID diagnosis (please include medications stopped within two weeks of time of diagnosis). (check all that apply)

- Hydroxyurea  
 Penicillin  
 Crizanlizumab  
 Voxelotor  
 Glutamine

Chronic red blood cell transfusions

- Yes  
 No

Most recent Hemoglobin S level in relationship to covid testing day

\_\_\_\_\_

# of weeks since last transfusion prior to illness

\_\_\_\_\_

Clinical reasons for receiving chronic red blood cell transfusions?

- Overt stroke  
 Silent stroke  
 High TCD result (Transcranial Doppler)  
 Pain  
 Splenic sequestration  
 Other

Other Reason for transfusion

\_\_\_\_\_

Is patient receiving chelation therapy?

- Yes  
 No

At the time of COVID diagnosis, was the patient taking an ACE inhibitor (angiotensin converting enzyme inhibitors) or an ARB (angiotensin-receptor blockers)?

- Yes  
 No

If patient is receiving other treatment, please describe

\_\_\_\_\_

Did the patient take any NSAIDS during the COVID19 infection?

- Yes  
 No

Were any of the SCD medications stopped due to COVID19?

- Yes  
 No

Home SCD medications stopped due to COVID19. (check all that apply)

- Hydroxyurea  
 Penicillin  
 Crizanlizumab  
 Voxelotor  
 Glutamin

Specify other medication that was stopped due to COVID19

\_\_\_\_\_

**Sickle cell disease-related history:**

Pain: Number of times hospitalized for pain in the last 3 years

\_\_\_\_\_

If this is unknown please enter "999"; if the patient has never experienced this enter "0"

Pain: Number of treat and release emergency department visits for pain requiring IV opioids in last 3 years

\_\_\_\_\_

If this is unknown please enter "999"; if the patient has never experienced this enter "0"

Acute chest syndrome: Number of episodes in last 3 years

\_\_\_\_\_

If this is unknown please enter "999"; if the patient has never experienced this enter "0"

Priapism: Number of episodes in last 3 years

\_\_\_\_\_

If this is unknown please enter "999"; if the patient has never experienced this enter "0"

|                                                 | Yes                   | No                    |
|-------------------------------------------------|-----------------------|-----------------------|
| Brain: Overt Stroke history                     | <input type="radio"/> | <input type="radio"/> |
| Brain: Silent Stroke History                    | <input type="radio"/> | <input type="radio"/> |
| Brain: Known CNS vasculopathy                   | <input type="radio"/> | <input type="radio"/> |
| Brain: High TCD result (Transcranial Doppler)   | <input type="radio"/> | <input type="radio"/> |
| Heart/Lung: Pulmonary hypertension              | <input type="radio"/> | <input type="radio"/> |
| Kidney disease: Albuminuria                     | <input type="radio"/> | <input type="radio"/> |
| Kidney disease: Decreased Renal function        | <input type="radio"/> | <input type="radio"/> |
| Kidney disease: Sickle cell disease nephropathy | <input type="radio"/> | <input type="radio"/> |
| Splenic Sequestration                           | <input type="radio"/> | <input type="radio"/> |

**Does the patient have any of the following comorbidities?**



Does the patient have any of the following comorbidities (check all that apply)?

- Cardiovascular disease (coronary artery disease, heart failure, arrhythmia, etc))
- Diabetes
- Asthma
- COPD
- Other Chronic Lung Disease (NOT asthma/COPD)
- Hypertension
- Cancer
- Chronic liver disease (PSC, NAFLD, cirrhosis, etc.)
- Current cigarette smoker
- Current user of other tobacco products other than cigarettes (vaping, etc.)

Does the patient have any of the following comorbidities (check all that apply)?

- Anxiety, depression, and/or behavioral problems
- Asthma
- Attention deficit/hyperactivity disorder
- Celiac disease
- Developmental delay or learning disability
- Diabetes
- Headaches
- Kidney Disease
- Obesity
- Seizure disorder
- Sleep disturbances
- Stroke
- Thyroid disease
- Current cigarette smoker
- Current user of other tobacco products other than cigarettes (vaping, etc.)

### COVID 19 Questions

Year of diagnosis of COVID 19

- |                            |                            |                            |
|----------------------------|----------------------------|----------------------------|
| <input type="radio"/> 2019 | <input type="radio"/> 2020 | <input type="radio"/> 2021 |
| <input type="radio"/> 2022 | <input type="radio"/> 2023 | <input type="radio"/> 2024 |
| <input type="radio"/> 2025 | <input type="radio"/> 2026 | <input type="radio"/> 2027 |
| <input type="radio"/> 2028 | <input type="radio"/> 2029 | <input type="radio"/> 2030 |
| <input type="radio"/> 2031 | <input type="radio"/> 2032 | <input type="radio"/> 2033 |
| <input type="radio"/> 2034 | <input type="radio"/> 2035 | <input type="radio"/> 2036 |
| <input type="radio"/> 2037 | <input type="radio"/> 2038 | <input type="radio"/> 2039 |
| <input type="radio"/> 2040 |                            |                            |

Specify approximate number of days of symptoms from COVID 19 (if known)

\_\_\_\_\_

Please choose a severity of COVID-19

- Asymptomatic-no clinical signs or symptoms during the positive COVID-19 period.
- Mild- symptoms of acute upper respiratory tract infection, including fever, fatigue, myalgia, cough, sore throat, runny nose, and sneezing or gastrointestinal symptoms or digestive symptoms such as nausea, vomiting, abdominal pain and diarrhea.
- Moderate-pneumonia, with or without clinical symptoms, no hypoxia
- Severe-early respiratory symptoms or gastrointestinal symptoms followed by dyspnea and hypoxia (O2 saturations less than 92%)
- Critical-ARDS, respiratory failure, encephalopathy, shock, coagulopathy, multi-organ impairment (lung, heart, kidney, brain) that may be life threatening

Have patient's symptoms resolved at the time of this report?

- Yes
- No
- Unknown
- Patient never developed symptoms (just tested positive)

### Did patient develop any of these sickle cell disease symptoms at the time of COVID 19 infection?

|                                          | Yes                   | No                    |
|------------------------------------------|-----------------------|-----------------------|
| Stroke                                   | <input type="radio"/> | <input type="radio"/> |
| Acute chest syndrome/pneumonia           | <input type="radio"/> | <input type="radio"/> |
| Pain                                     | <input type="radio"/> | <input type="radio"/> |
| Priapism                                 | <input type="radio"/> | <input type="radio"/> |
| Splenic sequestration                    | <input type="radio"/> | <input type="radio"/> |
| Aplastic crisis                          | <input type="radio"/> | <input type="radio"/> |
| Pulmonary hypertension                   | <input type="radio"/> | <input type="radio"/> |
| Heart arrhythmias                        | <input type="radio"/> | <input type="radio"/> |
| Heart failure                            | <input type="radio"/> | <input type="radio"/> |
| Venous Clot                              | <input type="radio"/> | <input type="radio"/> |
| Pulmonary Embolus                        | <input type="radio"/> | <input type="radio"/> |
| Arterial Clot                            | <input type="radio"/> | <input type="radio"/> |
| Kidney failure                           | <input type="radio"/> | <input type="radio"/> |
| Was Dialysis required?                   | <input type="radio"/> | <input type="radio"/> |
| Did the patient recover kidney function? | <input type="radio"/> | <input type="radio"/> |
| Bacterial infection                      | <input type="radio"/> | <input type="radio"/> |

What organism if known

---

**COVID 19 Treatment Medications**

|                                                                                     | Yes                   | No                    |
|-------------------------------------------------------------------------------------|-----------------------|-----------------------|
| Did the patient receive Hydroxychloroquine for treatment of the COVID-19 infection? | <input type="radio"/> | <input type="radio"/> |
| Azithromycin?                                                                       | <input type="radio"/> | <input type="radio"/> |
| Convalescent plasma infusion?                                                       | <input type="radio"/> | <input type="radio"/> |
| Corticosteroids?                                                                    | <input type="radio"/> | <input type="radio"/> |
| Tocilizumab (anti-IL6) ?                                                            | <input type="radio"/> | <input type="radio"/> |
| Remdesivir?                                                                         | <input type="radio"/> | <input type="radio"/> |
| Lopinavir/Ritonavir?                                                                | <input type="radio"/> | <input type="radio"/> |
| Heparin (any form) ?                                                                | <input type="radio"/> | <input type="radio"/> |

What type of dose was given

- Therapeutic dose  
 Preventative dose

**COVID 19 Treatment Course**

|                                                                                             | Yes                   | No                    | Unknown               |
|---------------------------------------------------------------------------------------------|-----------------------|-----------------------|-----------------------|
| Did patient die of COVID 19 or other complications caused by or contributed to by COVID 19? | <input type="radio"/> | <input type="radio"/> | <input type="radio"/> |
| Was patient evaluated in a hospital ER?                                                     | <input type="radio"/> | <input type="radio"/> | <input type="radio"/> |
| Has the patient been hospitalized?                                                          | <input type="radio"/> | <input type="radio"/> | <input type="radio"/> |

Length of stay (days)

\_\_\_\_\_

Did patient require a ventilator?

- Yes  
 No  
 Unknown

Did the patient receive blood transfusion?

- Yes  
 No

Did the patient receive the transfusion as:

- Simple transfusion  
 Exchange transfusion

Did patient require admission to an intensive care unit (including step-down units)?

- Yes  
 No  
 Unknown
